# Supplementary material for: A universal strategy for preparing carbon quantum dot-based composites with blue and green afterglow luminescence
Source: Royal Society of Chemistry journal article supplement (doi:10.1039/d1qm01235e), 2021-01-01
Supplement: d1qm01235e3.pdf [file d1qm01235e3.pdf]

**A Universal Strategy for Preparing Carbon Quantum Dots Based Composites  
with Blue and Green Afterglow Luminescence**

*Yaqing Zhu<sup>1</sup>, Jianliang Bai<sup>1</sup>, Zhujun Huang, Guojun Yuan, Lu Zhang, Xinyu Wang, Lili Ren\**

*School of Chemistry and Chemical Engineering, Southeast University, Nanjing, 211189, China*

[\*] Corresponding author. E-mail address: liliren@seu.edu.cn (L. Ren).

[<sup>1</sup>] These authors contributed equally to this work.

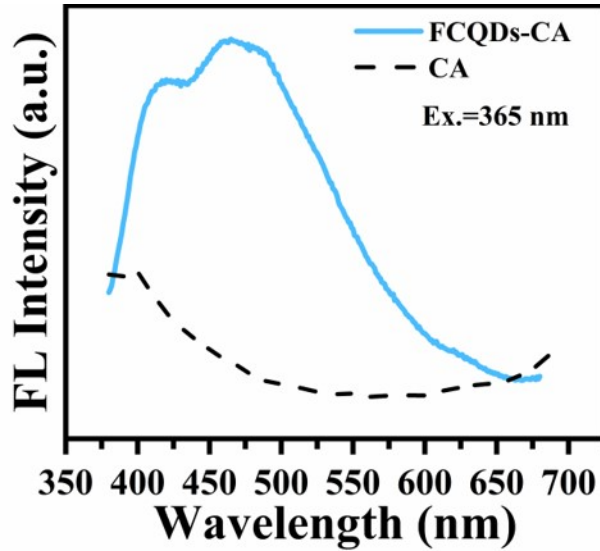

**Fig. S1.** FL emission spectra of FCQDs and CA at 365 nm excitation under ambient conditions.

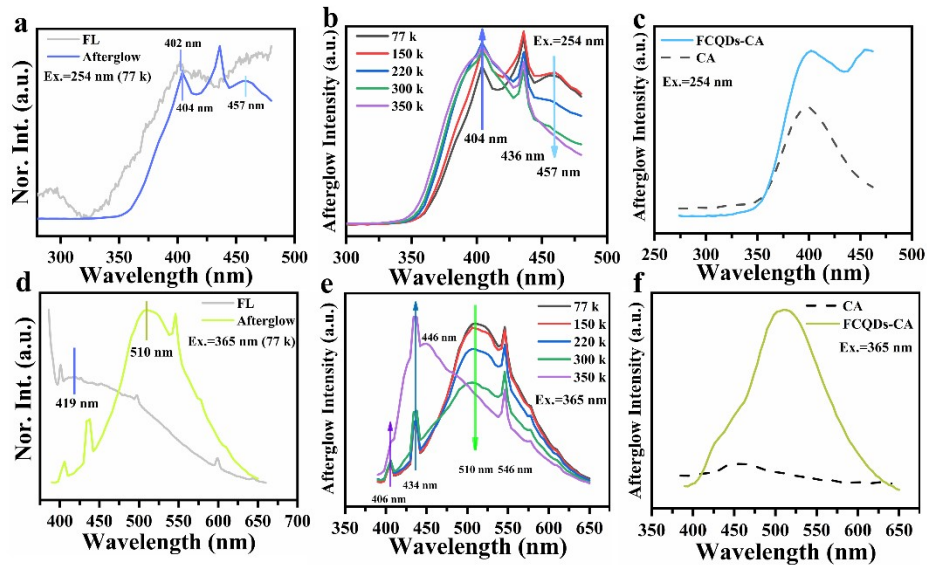

**Fig. S2.** (a) and (d) The normalized FL and afterglow emission spectra of FCQDs-CA powder at 254 nm and 365 nm excitation under 77 k, respectively. (b) and (e) Afterglow emission spectra of FCQDs-CA powder at different temperatures under 254 nm and 365 nm excitation, respectively. (c) and (f) Afterglow emission spectra of FCQDs-CA powder and CA under 254 nm and 365 nm excitation under ambient conditions, respectively.

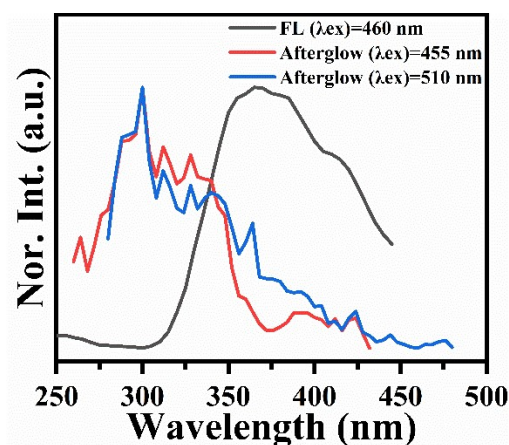

**Fig. S3.** FL (black line) and afterglow (red and blue line) excitation spectra of FCQDs-CA.

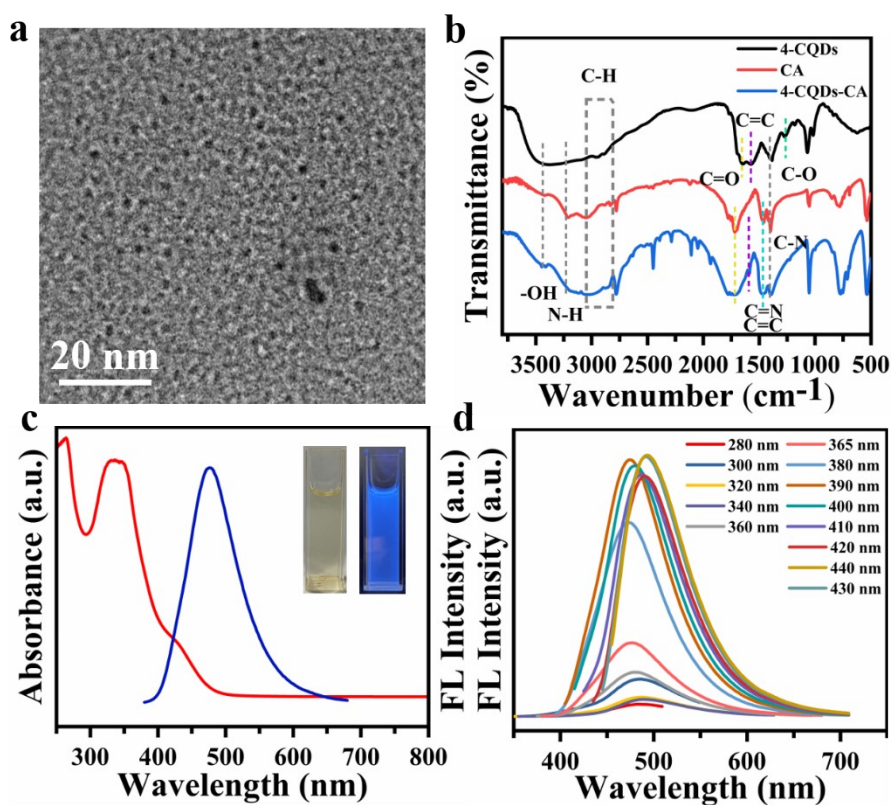

**Fig. S4.** (a) TEM image of 4-CQDs. (b) FT-IR spectra of 4-CQDs (black line), CA (red line) and 4-CQDs-CA (blue line). (c) UV/vis absorption (red line), FL emission (blue line) spectra of 4-CQDs in aqueous solution, and inset (a) photographs of this aqueous solution under day light (left) and UV light (365 nm) (right). (d) FL spectra of 4-CQDs dispersed in H<sub>2</sub>O under different excitation wavelengths.

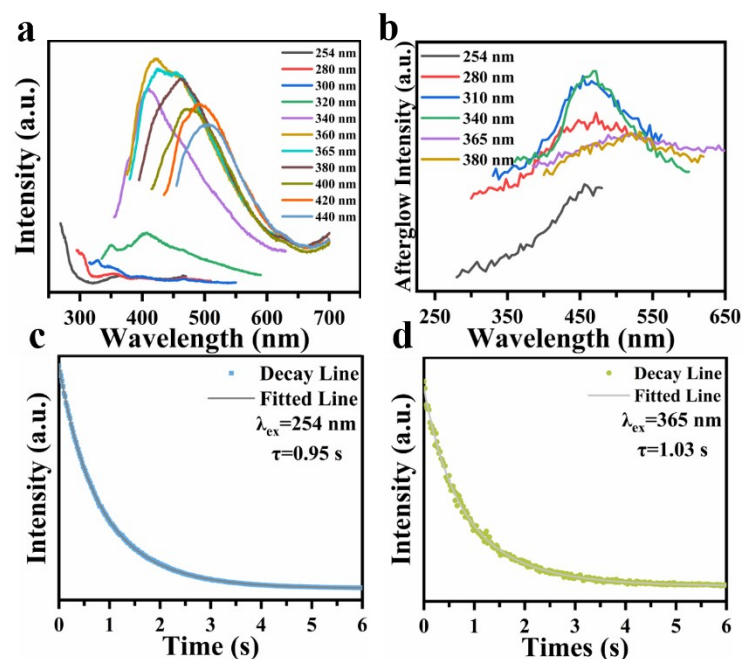

**Fig. S5.** (a) FL spectra of 4-FCQDs-CA under different excitation wavelengths. (b) Afterglow emission spectra of 4-FCQDs-CA powder under different excitation wavelengths. RTP decay spectra and fitted curve (blue line) and (green line) of 4-FCQDs-CA powder at 254 nm (c) and 365 nm (d) excitation under ambient conditions, respectively.

**Table S1.** The contents of C, N and O in FCQDs determined by XPS.

| Name  | C Content (%) | N Content (%) | O Content (%) |
|-------|---------------|---------------|---------------|
| FCQDs | 66.49         | 15.58         | 17.93         |

**Table S2.** The contents of each type of group in C 1s of FCQDs determined by the integration of deconvoluted XPS.

| Peak (eV)   | 284.80 | 285.54 | 288.40  |
|-------------|--------|--------|---------|
| Name        | C-C    | C-N    | C=N/C=O |
| Content (%) | 12.94  | 72.67  | 14.39   |

**Table S3.** The contents of each type of group in N 1s of FCQDs determined by the integration of deconvoluted XPS.

| Peak (eV)   | 398.93 | 399.61 | 400.10 |
|-------------|--------|--------|--------|
| Name        | C-N=C  | C-N    | N-H    |
| Content (%) | 12.31  | 24.67  | 63.02  |

**Table S4.** The contents of each type of group in O 1s of FCQDs determined by the integration of deconvoluted XPS.

| Peak (eV)   | 531.68 | 532.98 |
|-------------|--------|--------|
| Name        | C=O    | C-O    |
| Content (%) | 64.67  | 35.33  |

**Table S5.** Fitting parameters of the afterglow decay curves of FCQDs-CA under excitation at 254 nm and 365 nm.

| Wavelength<br>h | $\tau_1$ (s) | A1 (%) | $\tau_2$ (s) | A2 (%) | $\tau_{\text{avg}}$ (s) | $\chi^2$ |
|-----------------|--------------|--------|--------------|--------|-------------------------|----------|
| 254 nm          | 0.475        | 31.1   | 1.21         | 68.9   | 1.10                    | 0.982    |
| 365 nm          | 0.643        | 37.3   | 1.40         | 62.7   | 1.24                    | 0.999    |

**Table S6.** The lifetime and afterglow of different matrices

| Matrix           | Lifetime      | Afterglow                               |
|------------------|---------------|-----------------------------------------|
| Biuret [1]       | 1.06 s        | green                                   |
| Polyurethane [2] | 8.7 ms        | green                                   |
| Silica gel [3]   | 1.8 s         | green                                   |
| NaCl [4]         | 314 ms        | green                                   |
| Boric acid [5]   | 0.2 s - 2.3 s | blue, green, green-yellow<br>and orange |
| CA [this work]   | 1.24 s        | blue/green                              |

[1] Q. Li, M. Zhou, Q. Yang, Q. Wu, J. Shi, A. Gong and M. Yang, Efficient Room-Temperature Phosphorescence from Nitrogen-Doped Carbon Dots in Composite Matrices, *Chem. Mater.*, 2016, **28**, 8221-8227.

[2] J. Tan, R. Zou, J. Zhang, W. Li, L. Zhang and D. Yue, Large-scale synthesis of N-doped carbon quantum dots and their phosphorescence properties in a polyurethane

matrix, *Nanoscale*, 2016, **8**, 4742-4747.

- [3] J. Joseph and A. A. Anappara, Cool white, persistent room-temperature phosphorescence in carbon dots embedded in a silica gel matrix, *Phys. Chem. Chem. Phys.*, 2017, **19**, 15137-15144.
- [4] H. Liu, F. Wang, Y. Wang, J. Mei and D. Zhao, Whispering Gallery Mode Laser from Carbon Dot-NaCl Hybrid Crystals, *ACS Appl. Mater. Interfaces*, 2017, **9**, 18248-18253.
- [5] W. Li, W. Zhou, Z. Zhou, H. Zhang, X. Zhang, J. Zhuang, Y. Liu, B. Lei and C. Hu, A Universal Strategy for Activating the Multicolor Room-Temperature Afterglow of Carbon Dots in a Boric Acid Matrix, *Angew. Chem.*, 2019, **131**, 7356-7361.
